# Supplementary material
Source: Royal Society of Chemistry journal article supplement (doi:10.1039/d6tc00186f)
Supplement: d6tc00186f1.pdf [file d6tc00186f1.pdf]

## Support Information for:

### Electrical Double-Layer based Wearable Tensile and Pressure Sensors: Optimizing Materials and Architecture for Improved Sensing Response

I.R.Silva <sup>a</sup>, N. Pereira <sup>a,\*</sup>, N. Perinka<sup>b</sup>, D. M. Correia<sup>c</sup>, S. Lanceros-Méndez <sup>a,b,d,\*</sup>

<sup>a</sup> Physics Centre of Minho and Porto Universities (CF-UM-UP) and Laboratory of Physics for Materials and Emergent Technologies (LapMET), University of Minho 4710-057 Braga, Portugal

<sup>b</sup> BCMaterials, Basque Center for Materials, Applications and Nanostructures, UPV/EHU Science Park, 48940 Leioa, Spain

<sup>c</sup> Centre of Chemistry, University of Minho, 4710-057 Braga, Portugal

<sup>d</sup> Ikerbasque, Basque Foundation for Science, 48009 Bilbao, Spain

\* Corresponding Authors

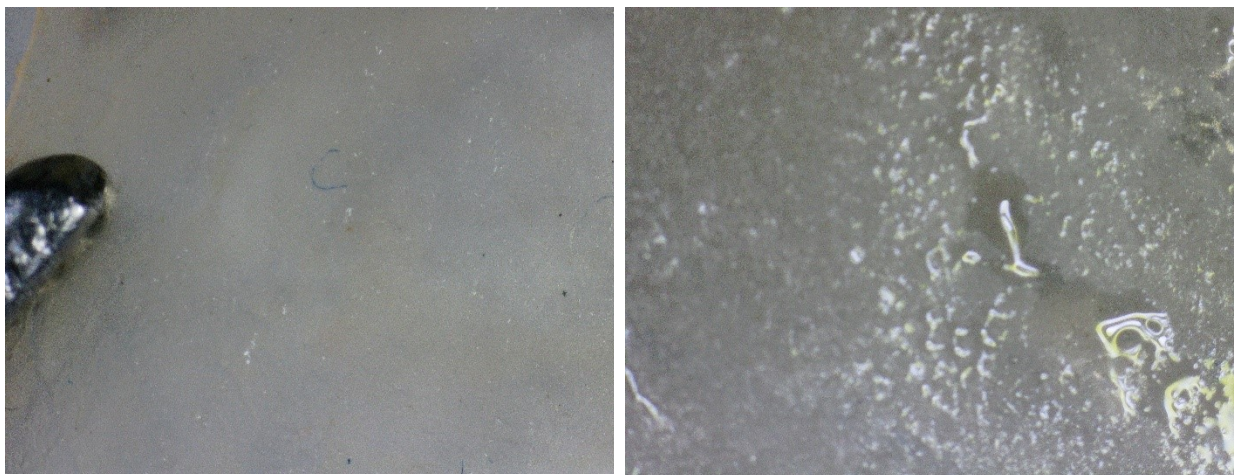

Figure S 1 a) TPU/40IL, b) TPU/60IL after 24 hours.

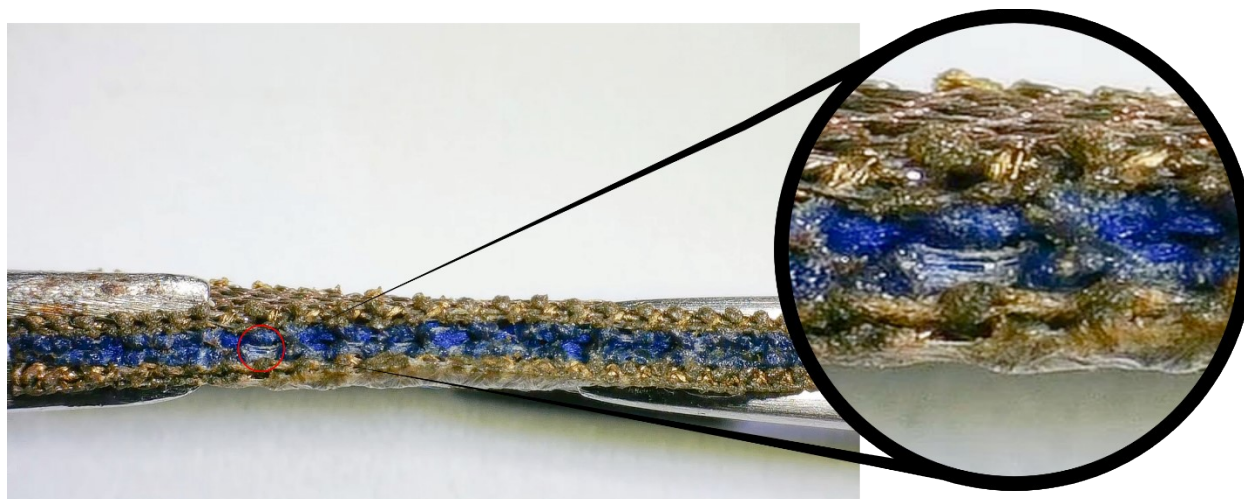

Figure S 2 a) Neoprene filled with 40% IL scaffold under stretching, with detail of the TPU/ IL stretching and continuity breaks.

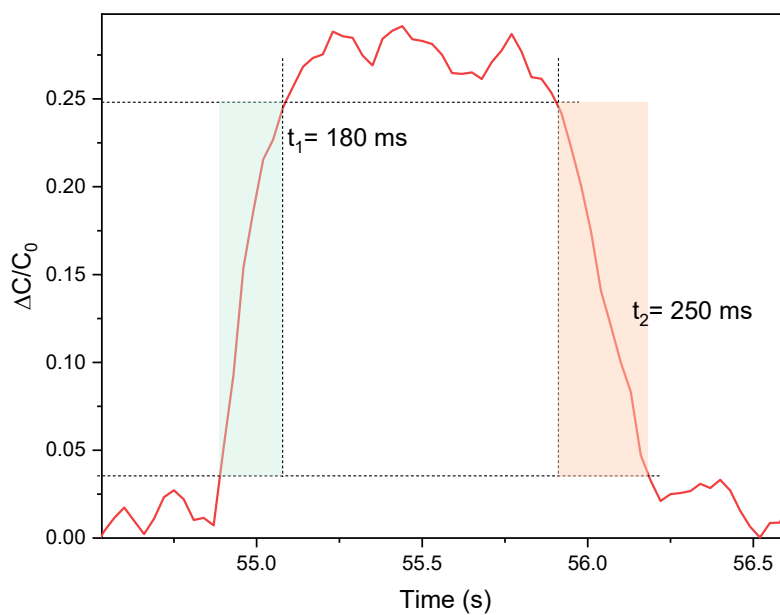

Figure S3 Dynamic response of the IL/TPU sensor to a strain pulse ( $t_1$ ) response ( $t_2$ ) recovery times.

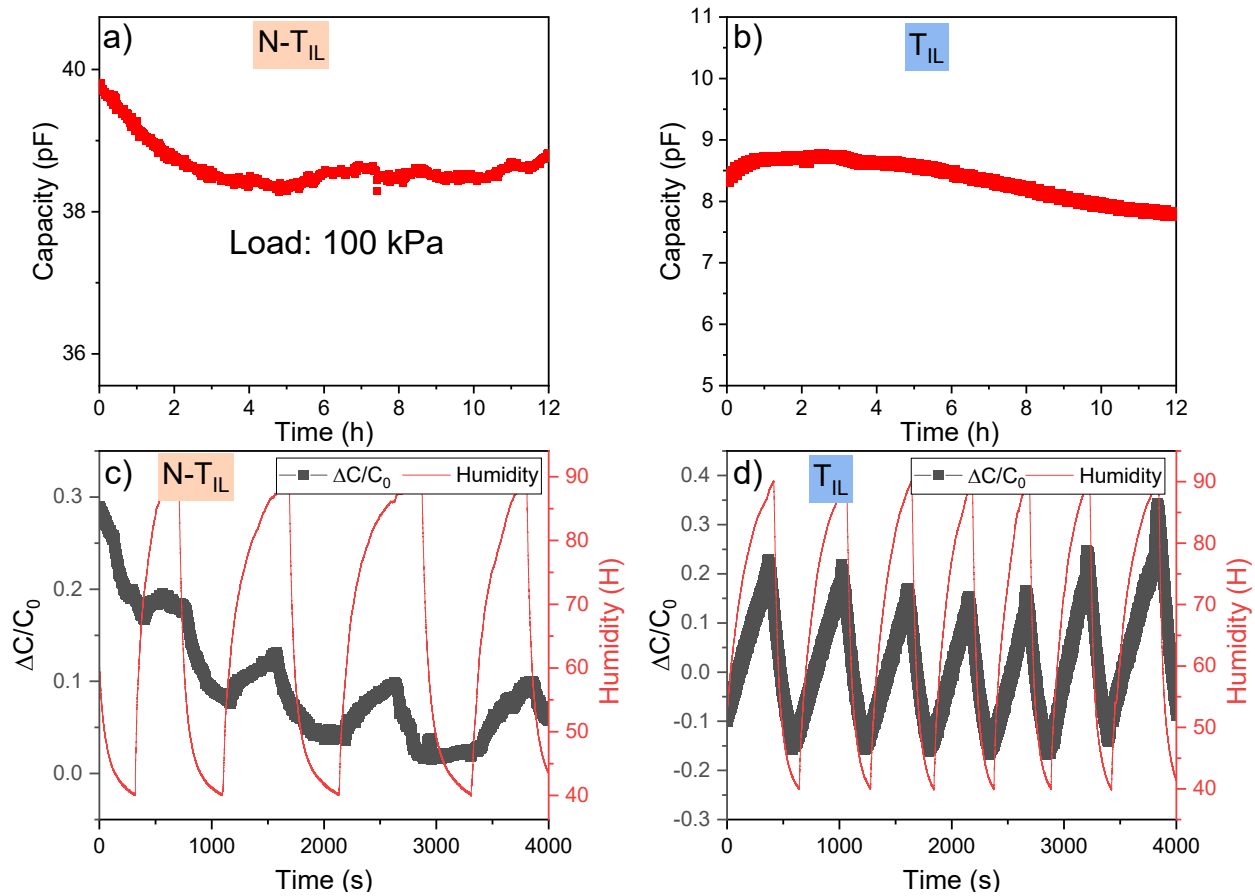

Figure S4. a)  $N-T_{IL}$  stability under a load of 100kPa for 12h, b)  $T_{IL}$  stability for 12 h at 60 %RH. c) Humidity-dependent stability tests in the range of 40 to 90 %RH for c)  $N-T_{IL}$ , d)  $T_{IL}$  samples.
